# Supplementary material for: Growth of Chlamydomonas reinhardtii in acetate-free medium when co-cultured with alginate-encapsulated, acetate-producing strains of Synechococcus sp. PCC 7002
Source: PubMed Central journal article supplement (PMC4216383; doi:10.1186/s13068-014-0154-2), 2014-10-18

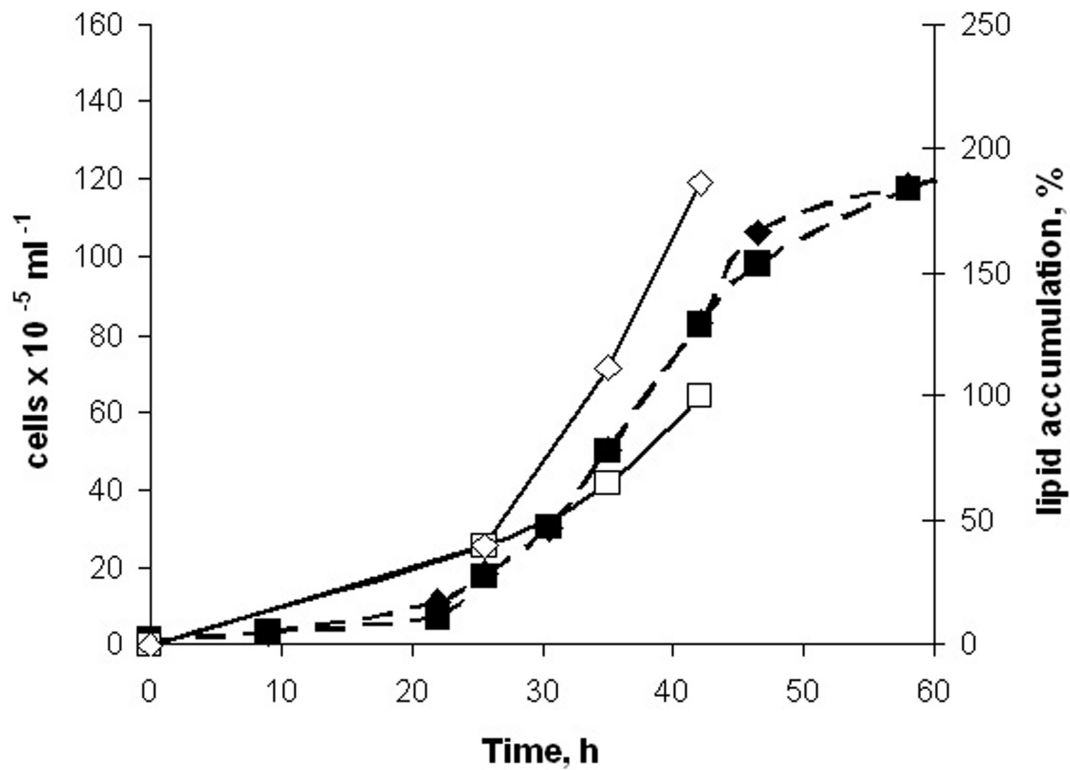

Supplement: 13068_2014_154_MOESM2_ESM.pdf [file 13068_2014_154_MOESM2_ESM.pdf]
